# Supplementary material for: Concentrations and Retention Efficiency of Tire Wear Particles from Road Runoff in Bioretention Cells
Source: MDPI journal article supplement (doi:10.3390/w14203233), 2022-10-14
Supplement: s1 [file s1]

Archive with 1 entries (1 files):
- water-1901193-supplementary.pdf
